# Supplementary material for: Regeneration of collagen fibrils at the papillary dermis by reconstructing basement membrane at the dermal–epidermal junction
Source: PubMed Central journal article supplement (PMC8764085; doi:10.1038/s41598-022-04856-1), 2022-01-17
Supplement: 41598_2022_4856_MOESM1_ESM.pdf [file 41598_2022_4856_MOESM1_ESM.pdf]

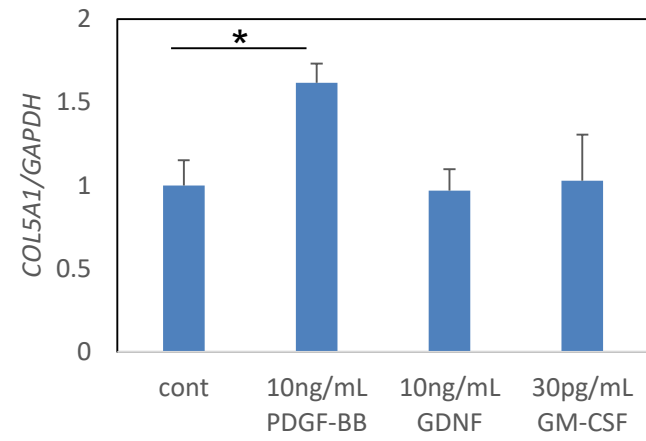

Type III collagen  
/ Keratin-14

Cont

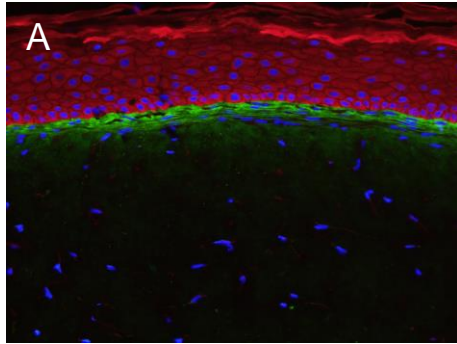

$10^{-5}$ M CGS27023A  
 $10^{-5}$ M BIPBIPU

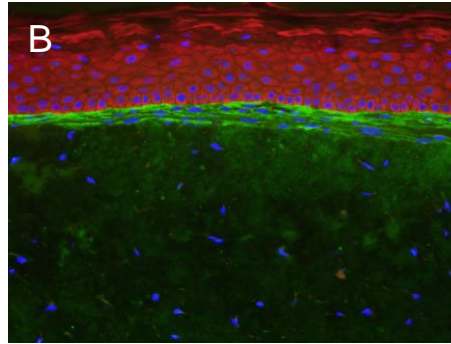

100ng/mL PDGF-BB

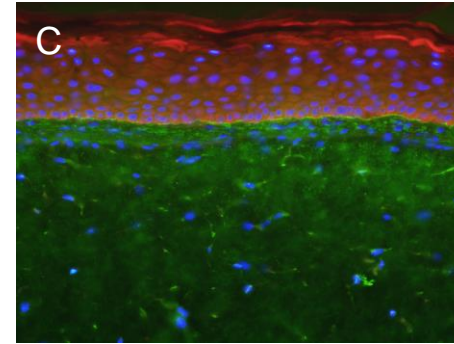

100ng/mL PDGF-BB  
 $10^{-5}$ M CGS27023A  
 $10^{-5}$ M BIPBIPU

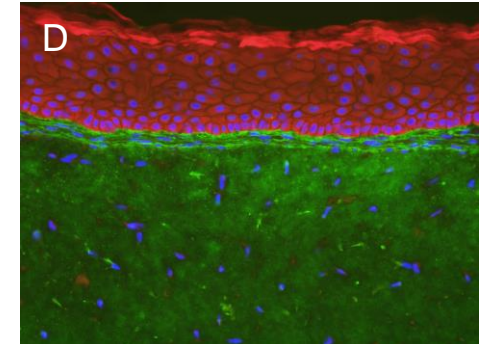

Type V collagen  
/ Keratin-14

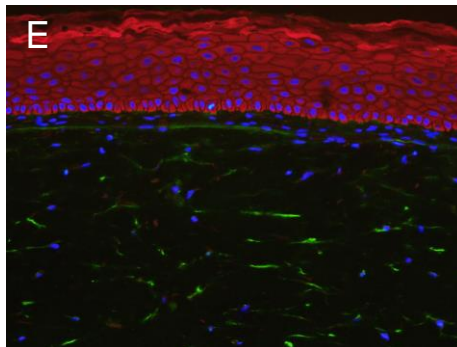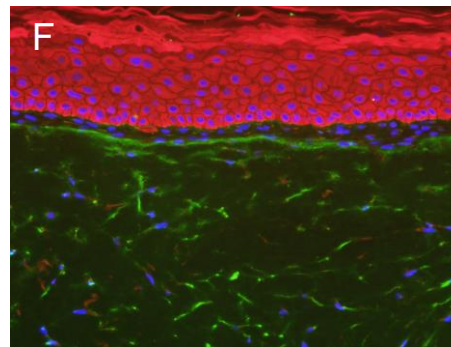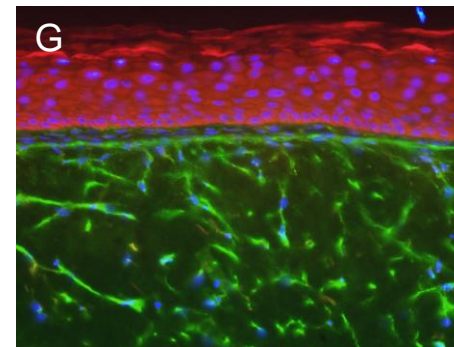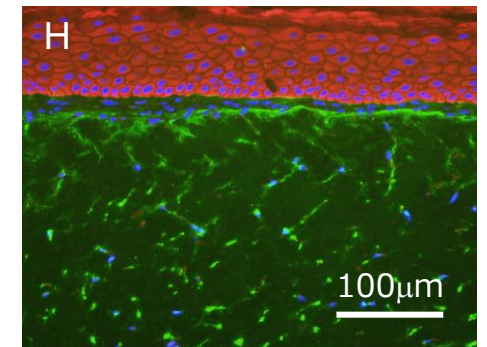

100 $\mu$ m

**A**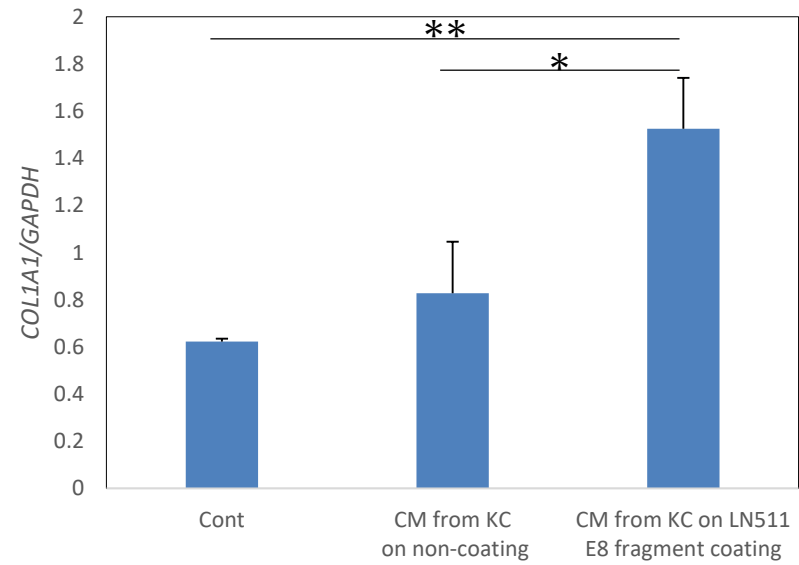**B**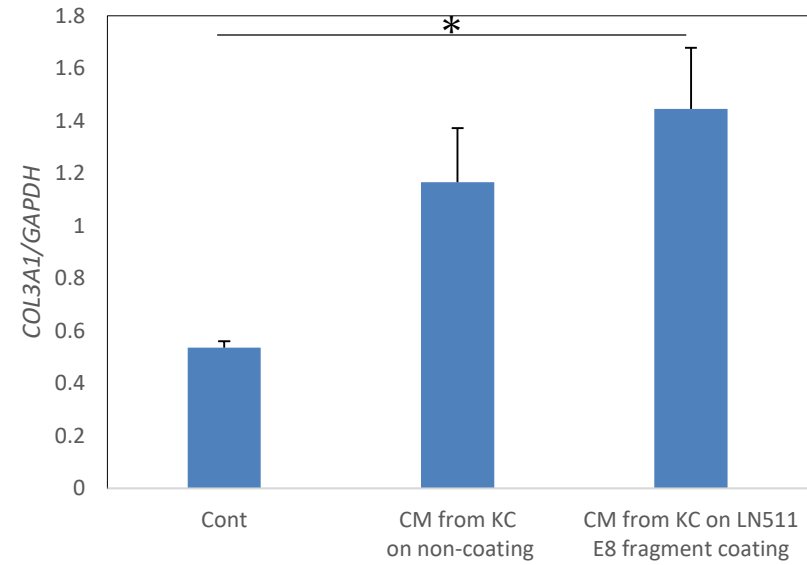**C**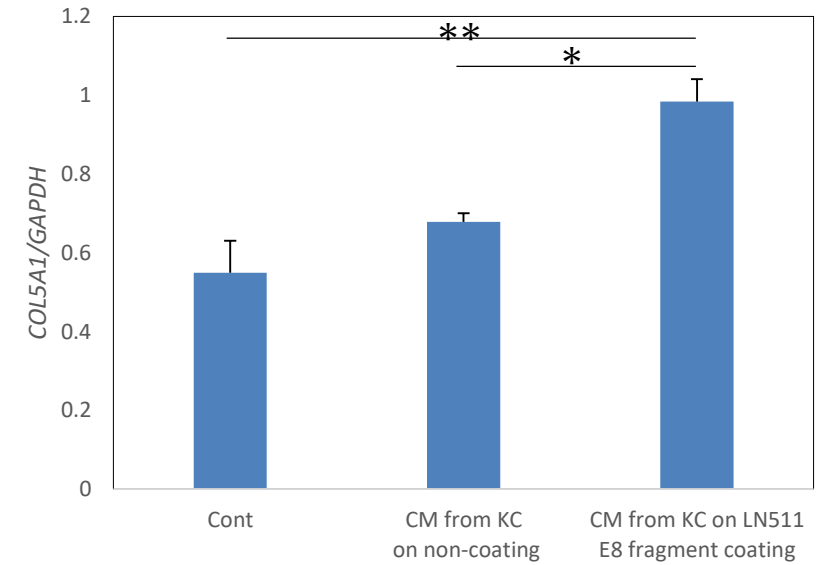

Cont

CGS27023A + BIPBIPU

HEI

PDGFRb  
/ K14

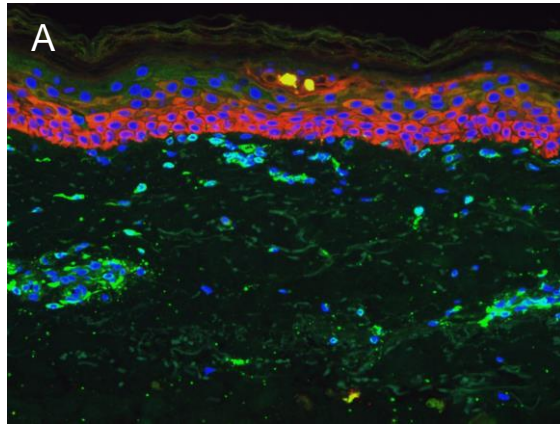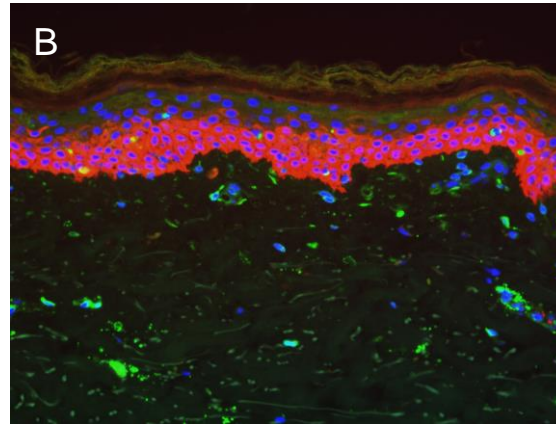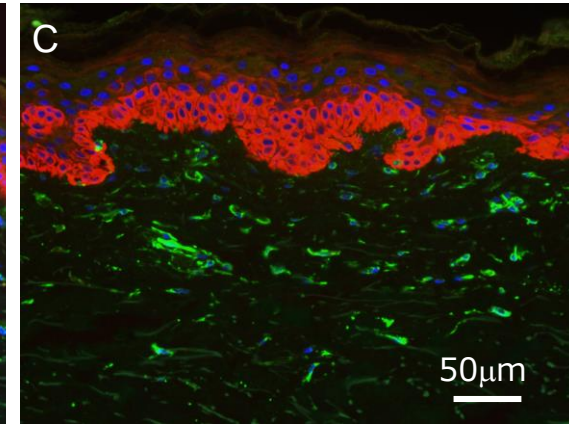

Type I  
procollagen

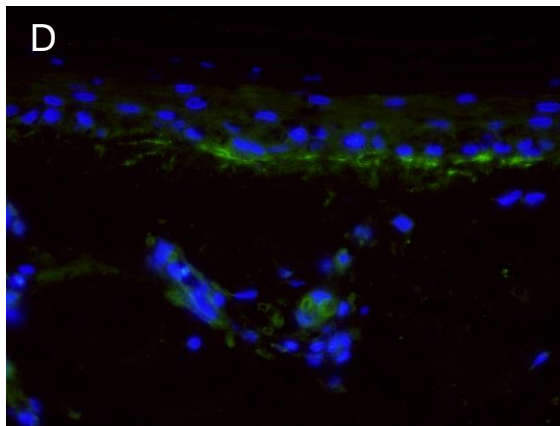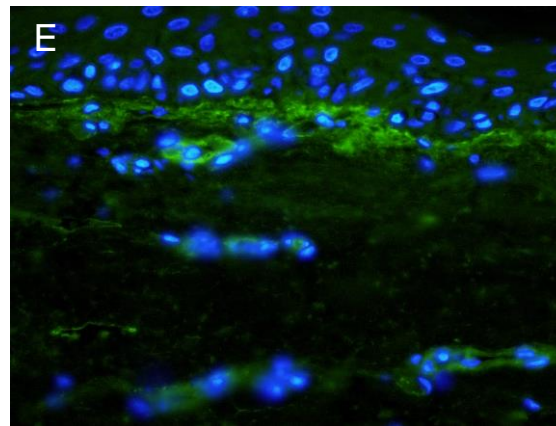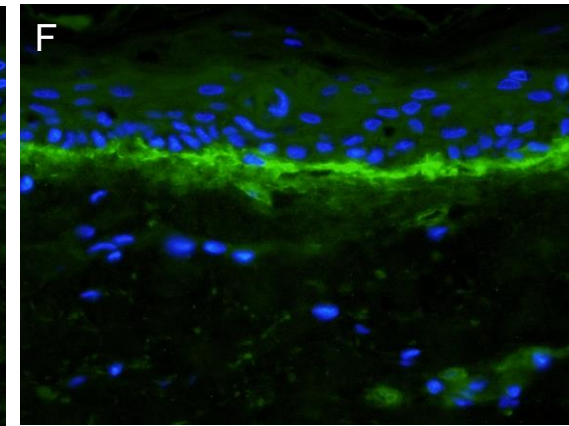

Type V collagen  
/ K14

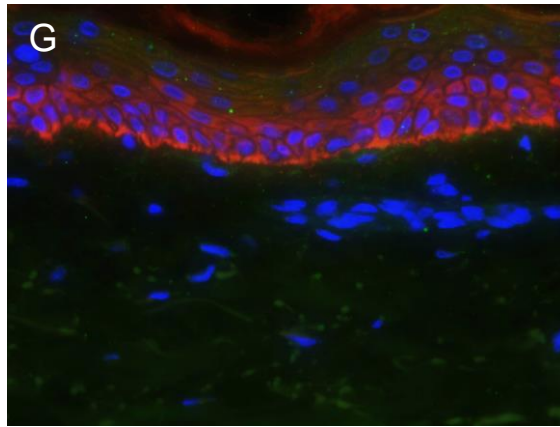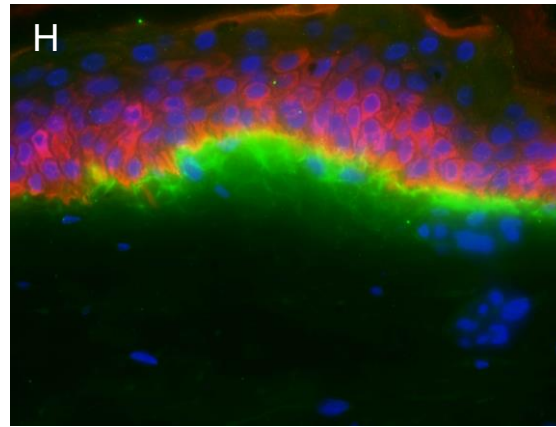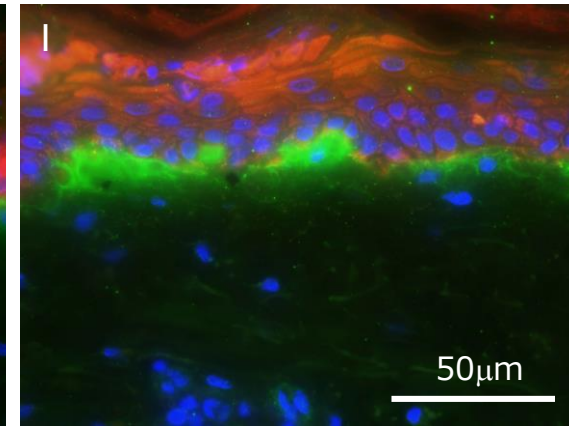

Cont

CGS27023A + BIPBIPU

HEI

PDGFRb  
/ K14

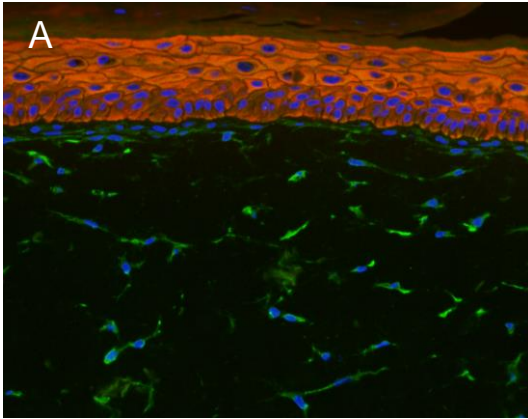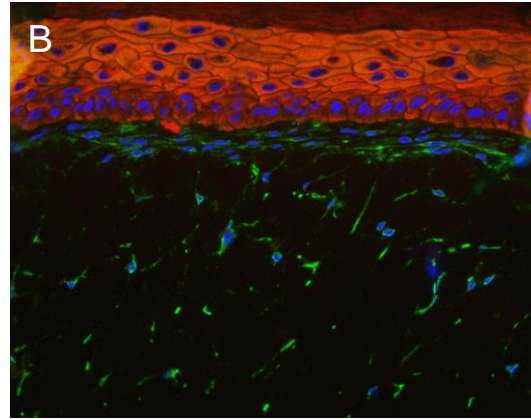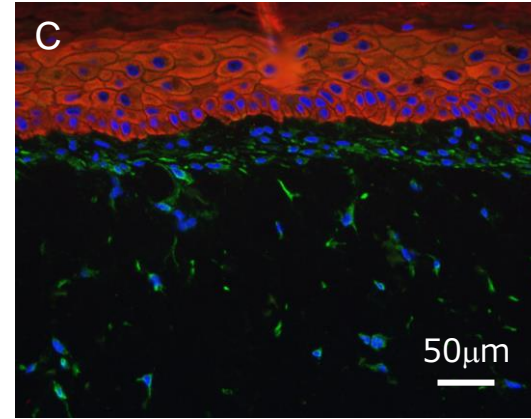

Type I  
procollagen  
/ K14

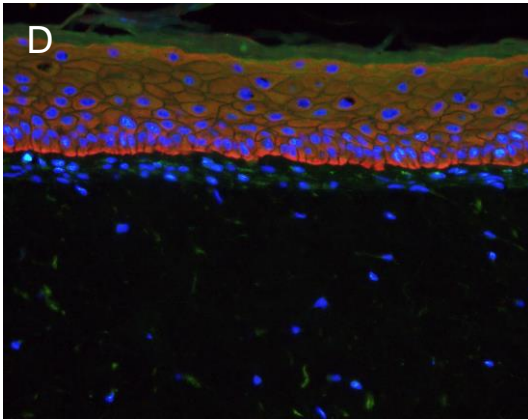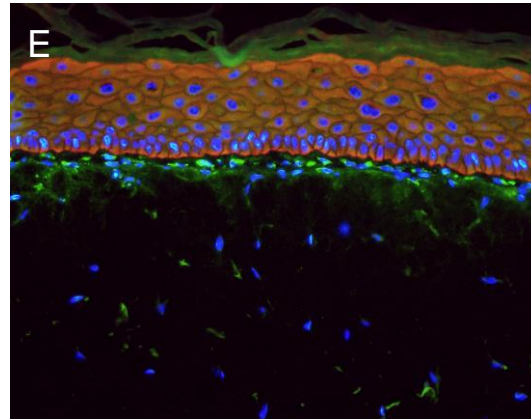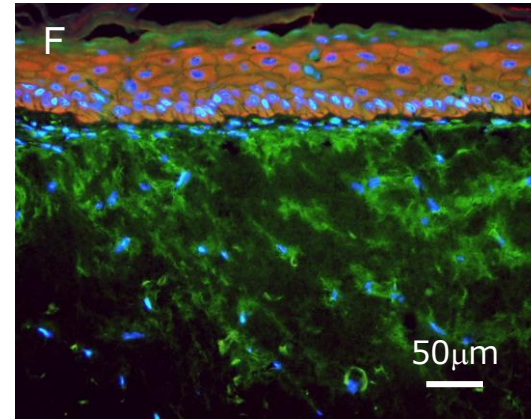

Type V  
collagen  
/ K14

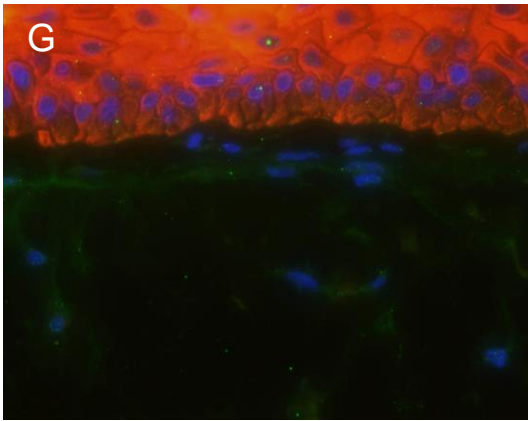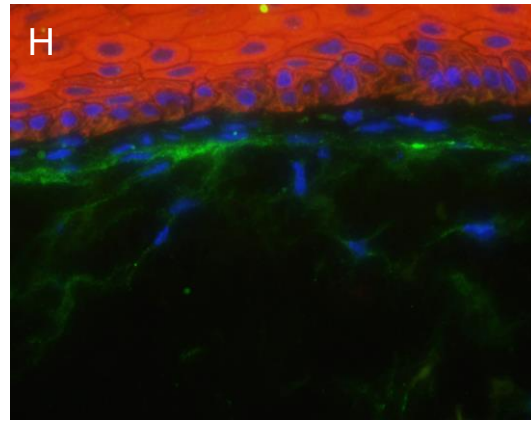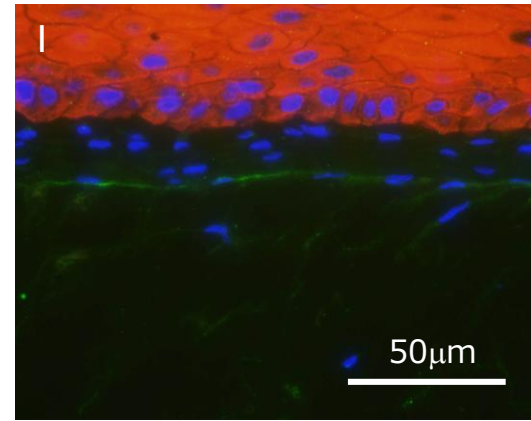

A

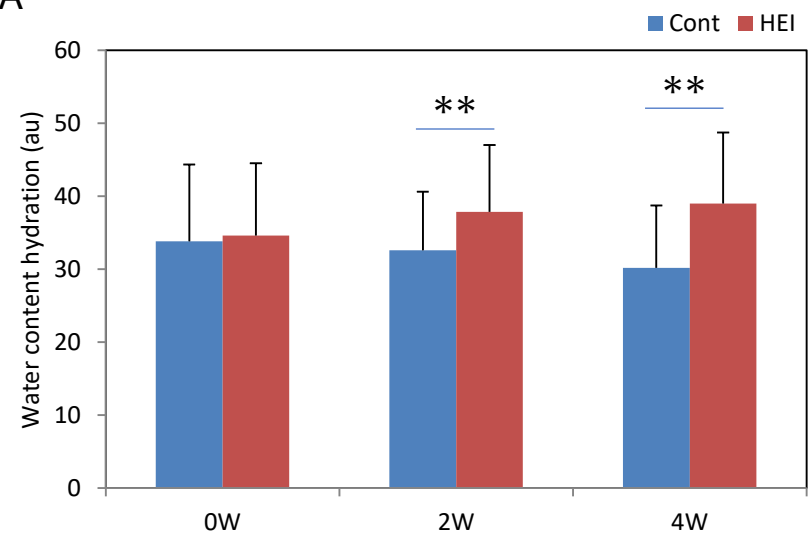

B

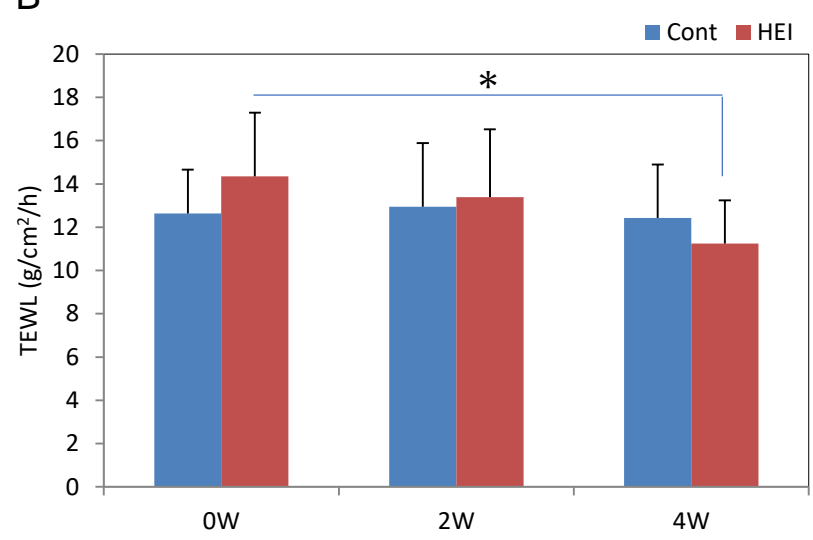

Supplementary Table S1 Source of human skin for histological experiments

| Age          | Sex    | Origin    | Anatomical site |
|--------------|--------|-----------|-----------------|
| 26 years old | Female | Caucasian | Abdomen         |
| 27 years old | Female | Caucasian | Abdomen         |
| 32 years old | Female | Caucasian | Abdomen         |
| 32 years old | Female | Caucasian | Abdomen         |
| 35 years old | Female | Caucasian | Abdomen         |
| 37 years old | Female | Caucasian | Abdomen         |
| 37 years old | Female | Caucasian | Abdomen         |
| 39 years old | Female | Caucasian | Abdomen         |
| 61 years old | Female | Caucasian | Abdomen         |
| 61 years old | Female | Caucasian | Abdomen         |
| 63 years old | Female | Caucasian | Abdomen         |
| 63 years old | Female | Caucasian | Abdomen         |
| 66 years old | Female | Caucasian | Abdomen         |
| 68 years old | Female | Caucasian | Abdomen         |
| 71 years old | Female | Caucasian | Abdomen         |
| 73 years old | Female | Caucasian | Abdomen         |
| 78 years old | Female | Caucasian | Abdomen         |
| 61 years old | Female | Caucasian | Facial          |
| 61 years old | Female | Caucasian | Facial          |
| 62 years old | Female | Caucasian | Facial          |
| 66 years old | Female | Caucasian | Facial          |
| 67 years old | Female | Caucasian | Facial          |
| 71 years old | Female | Caucasian | Facial          |
| 72 years old | Female | Caucasian | Facial          |

Supplementary Table S2 Source of organotypic human skin

| Age          | Sex    | Origin    | Anatomical site |
|--------------|--------|-----------|-----------------|
| 26 years old | Female | Caucasian | Abdomen         |
| 23 years old | Female | Caucasian | Abdomen         |
| 32 years old | Female | Caucasian | Abdomen         |
| 22 years old | Female | Caucasian | Abdomen         |
| 30 years old | Female | Caucasian | Abdomen         |
| 29 years old | Female | Caucasian | Abdomen         |



### Supplementary Table S3 Source of cultured keratinocytes

| Age          | Sex    | Origin    | Anatomical site |
|--------------|--------|-----------|-----------------|
| 12 years old | female | Caucasian | Abdomen         |
| 17 years old | female | Caucasian | Abdomen         |
| 18 years old | female | Caucasian | Abdomen         |
| 20 years old | female | Caucasian | Abdomen         |
| 22 years old | female | Caucasian | Abdomen         |
| 28 years old | female | Caucasian | Abdomen         |
| 33 years old | female | Caucasian | Abdomen         |
| 42 years old | female | Caucasian | Abdomen         |
| 50 years old | female | Caucasian | Abdomen         |
| 53 years old | female | Caucasian | Abdomen         |
| 54 years old | female | Caucasian | Abdomen         |
| 60 years old | female | Caucasian | Abdomen         |
| 62 years old | female | Caucasian | Abdomen         |
| 62 years old | female | Caucasian | Abdomen         |

## Supplementary Table S4 Source of cultured fibroblasts

| Age          | Sex    | Origin    | Anatomical site |
|--------------|--------|-----------|-----------------|
| 20 years old | female | Caucasian | Abdomen         |
| 22 years old | female | Caucasian | Abdomen         |
| 27 years old | female | Caucasian | Abdomen         |
| 28 years old | female | Caucasian | Abdomen         |
| 32 years old | female | Caucasian | Abdomen         |
| 33 years old | female | Caucasian | Abdomen         |
| 37 years old | female | Caucasian | Abdomen         |
| 50 years old | female | Caucasian | Abdomen         |
| 53 years old | female | Caucasian | Abdomen         |
| 54 years old | female | Caucasian | Abdomen         |
| 60 years old | female | Caucasian | Abdomen         |
| 62 years old | female | Caucasian | Abdomen         |
| 62 years old | female | Caucasian | Abdomen         |
| 68 years old | female | Caucasian | Abdomen         |
